# Supplementary material
Source: PubMed Central journal article supplement (PMC2043027)
Supplement: pbio.0050261.st001.pdf [file pbio.0050261.st001.pdf]

## Supplemental Table 1

### A

|       | classification      | Fold Induction at<br>13.5 hrs (1.75%<br>glucose) | Fold Induction at<br>18.5 hrs (0.1%<br>glucose) | Number of STREs | Nearest STRE position |
|-------|---------------------|--------------------------------------------------|-------------------------------------------------|-----------------|-----------------------|
| GSY2  | metabolism          | 3.73                                             | 10.41                                           | 2               | -326                  |
| PGM2  | metabolism          | 3.34                                             | 9.13                                            | 3               | -255                  |
| HSP12 | cell rescue         | 2.99                                             | 12.13                                           | 5               | -184                  |
| PRC1  | protein destination | 2.35                                             | 3.27                                            | 2               | -160                  |
| PNC1  | unclassified        | 2.23                                             | 7.06                                            | 4               | -287                  |
| COX5b | metabolism          | 2.14                                             | 7.94                                            | 2               | -163                  |
| TPK1  | signal transduction | 2.08                                             | 3.29                                            | 3               | -129                  |
| TSL1  | metabolism          | 2.06                                             | 3.18                                            | 4               | -160                  |
| TPS2  | metabolism          | 2.04                                             | 4.06                                            | 5               | -303                  |
| HSP26 | cell rescue         | 2.01                                             | 12.38                                           | 4               | -320                  |

### B

|         | classification        | Fold Induction at<br>13.5 hrs (1.75%<br>glucose) | Fold Induction at<br>18.5 hrs (0.1%<br>glucose) | Number of STREs | Nearest STRE position |
|---------|-----------------------|--------------------------------------------------|-------------------------------------------------|-----------------|-----------------------|
| YNL194c | unclassified          | 0.89                                             | 14.93                                           | 4               | -284                  |
| HSP42   | protein destination   | 1.80                                             | 12.38                                           | 3               | -180                  |
| CTT1    | cell rescue           | 1.66                                             | 12.30                                           | 2               | -358                  |
| YKL026c | metabolism            | 1.20                                             | 12.04                                           | 2               | -242                  |
| YGR043c | metabolism            | 0.93                                             | 11.24                                           | 3               | -166                  |
| ACH1    | metabolism            | 1.08                                             | 6.59                                            | 4               | -130                  |
| HXK1    | metabolism            | 1.99                                             | 5.78                                            | 5               | -340                  |
| HSP104  | cell rescue           | 1.79                                             | 5.28                                            | 3               | -166                  |
| HSP78   | protein destination   | 1.71                                             | 5.17                                            | 3               | -136                  |
| GAC1    | metabolism            | 1.21                                             | 5.10                                            | 1               | -459                  |
| GLK1    | metabolism            | 1.72                                             | 4.92                                            | 3               | -110                  |
| YHR195w | unclassified          | 1.10                                             | 4.26                                            | 2               | -188                  |
| NTH1    | metabolism            | 1.82                                             | 4.14                                            | 3               | -150                  |
| YDL085w | metabolism            | 0.92                                             | 4.14                                            | 2               | -133                  |
| YIR038c | GTT1                  | 1.58                                             | 3.89                                            | 3               | -110                  |
| YAL061w | metabolism            | 0.81                                             | 3.73                                            | 2               | -126                  |
| CYC7    | cellular organization | 1.03                                             | 3.73                                            | 3               | -193                  |
| YPL004c | unclassified          | 1.44                                             | 3.61                                            | 3               | -178                  |
| YBR149w | metabolism            | 1.30                                             | 3.58                                            | 2               | -82                   |
| TPS1    | metabolism            | 1.47                                             | 3.41                                            | 6               | -233                  |
| YAK1    | signal transduction   | 0.87                                             | 3.14                                            | 3               | -208                  |
| YKR076w | unclassified          | 1.18                                             | 3.12                                            | 2               | -112                  |
| YLR168c | protein destination   | 1.12                                             | 2.95                                            | 2               | -244                  |
| XBP1    | transcription         | 1.21                                             | 2.95                                            | 3               | -322                  |
| YNR014w | unclassified          | 0.69                                             | 2.83                                            | 4               | -220                  |
| ACS1    | metabolism            | 0.88                                             | 2.77                                            | 2               | -240                  |
| YPL230w | transcription         | 1.34                                             | 2.68                                            | 3               | -323                  |
| YIL124w | metabolism            | 1.88                                             | 2.62                                            | 2               | -90                   |
| YKL094w | unclassified          | 1.13                                             | 2.53                                            | 2               | -127                  |
| YMR322c | unclassified          | 0.79                                             | 2.50                                            | 2               | -145                  |
| YLR312c | unclassified          | 1.13                                             | 2.39                                            | 2               | -264                  |

|         |                       |      |      |   |      |
|---------|-----------------------|------|------|---|------|
| YIL113w | signal transduction   | 1.03 | 2.36 | 2 | -126 |
| POR2    | cellular organization | 1.05 | 2.23 | 2 | -385 |
| RAS2    | signal transduction   | 1.05 | 2.23 | 5 | -330 |
| YIR016w | unclassified          | 0.98 | 2.17 | 2 | -153 |
| YNL077w | protein destination   | 0.80 | 2.17 | 2 | -384 |
| YMR031c | unclassified          | 1.31 | 2.14 | 2 | -180 |
| MDH2    | metabolism            | 0.74 | 2.11 | 3 | -184 |

### C

|         | classification        | Fold Induction at<br>13.5 hrs (1.75%<br>glucose) | Fold Induction at<br>18.5 hrs (0.1%<br>glucose) | Number of STREs | Nearest STRE position |
|---------|-----------------------|--------------------------------------------------|-------------------------------------------------|-----------------|-----------------------|
| SSA4    | protein destination   | 0.89                                             | 1.97                                            | 3               | -354                  |
| YDR479c | unclassified          | 0.95                                             | 1.85                                            | 2               | -128                  |
| YDL025c | signal transduction   | 1.22                                             | 1.77                                            | 3               | -267                  |
| YKR075c | unclassified          | 0.81                                             | 1.66                                            | 2               | -425                  |
| YKL107w | unclassified          | 0.75                                             | 1.62                                            | 2               | -136                  |
| GLC7    | metabolism            | 1.13                                             | 1.55                                            | 2               | -250                  |
| PIG2    | metabolism            | 0.84                                             | 1.55                                            | 2               | -325                  |
| YGR086c | unclassified          | 0.95                                             | 1.49                                            | 3               | -200                  |
| YLR390w | unclassified          | 1.02                                             | 1.47                                            | 2               | -100                  |
| YPL003w | protein destination   | 0.90                                             | 1.37                                            | 3               | -165                  |
| MDJ1    | protein destination   | 0.90                                             | 1.37                                            | 4               | -350                  |
| RPB4    | transcription         | 1.06                                             | 1.36                                            | 3               | -357                  |
| YLL020c | unclassified          | 0.81                                             | 1.35                                            | 3               | -350                  |
| YGL036w | unclassified          | 0.82                                             | 1.35                                            | 4               | -349                  |
| SGA1    | metabolism            | 0.94                                             | 1.34                                            | 4               | -180                  |
| YLR108c | unclassified          | 0.57                                             | 1.33                                            | 3               | -200                  |
| SPS100  | cellular organization | 0.81                                             | 1.32                                            | 2               | -145                  |
| TPS3    | metabolism            | 1.19                                             | 1.29                                            | 2               | -211                  |
| CPH1    | protein destination   | 1.21                                             | 1.27                                            | 2               | -379                  |
| DAL1    | metabolism            | 0.66                                             | 1.24                                            | 2               | -94                   |
| YMR106c | cell rescue/yku80     | 0.68                                             | 1.16                                            | 2               | -440                  |
| YML101c | unclassified          | 0.73                                             | 1.06                                            | 4               | -210                  |
| DIG2    | cellular organization | 1.07                                             | 1.05                                            | 2               | -382                  |
| YBR004c | protein destination   | 1.09                                             | 1.02                                            | 2               | -465                  |
| YLL025w | unclassified          | 1.01                                             | 1.01                                            | 2               | -477                  |
| SSA1    | protein destination   | 0.99                                             | 1.01                                            | 2               | -155                  |
| PAU6    | cell rescue           | 1.01                                             | 0.97                                            | 2               | -330                  |
| PTP2    | signal transduction   | 0.69                                             | 0.94                                            | 2               | -110                  |
| GPH1    | metabolism            | 1.08                                             | 0.87                                            | 3               | -327                  |
| YLR177w | unclassified          | 0.90                                             | 0.85                                            | 4               | -117                  |
| RET1    | transcription         | 0.64                                             | 0.79                                            | 2               | -353                  |
| YEL045c | unclassified          | 0.63                                             | 0.76                                            | 2               | -443                  |
| STE23   | protein destination   | 0.75                                             | 0.72                                            | 3               | -268                  |
| YNR013c | metabolism/Pho91      | 0.75                                             | 0.60                                            | 4               | -456                  |
