# Supplementary material
Source: PubMed Central journal article supplement (PMC2043027)
Supplement: pbio.0050261.st002.pdf [file pbio.0050261.st002.pdf]

Supplemental Table 2

|                               | Number of Genes | Avg. Number of STREs | Avg. Position of nearest STRE |
|-------------------------------|-----------------|----------------------|-------------------------------|
| Genes Induced >2x at 13.5 hrs | 10              | 3.4                  | -228.7                        |
| Genes Induced >2x at 18.5 hrs | 38              | 2.736842105          | -210.5526316                  |
| Genes Induced <2x at 18.5hrs  | 34              | 2.617647059          | -279.3529412                  |
|                               | 82              | 2.773809524          | -241.4761905                  |
