# Supplementary material
Source: PubMed Central journal article supplement (PMC2043027)
Supplement: pbio.0050261.st003.pdf [file pbio.0050261.st003.pdf]

### Supplemental Table 3

|                      |                  |           |                 |                |                      |
|----------------------|------------------|-----------|-----------------|----------------|----------------------|
| Fig. 1a              | average lifespan | wt 2%     | wt CR           | msn 2/4 2%     | msn 2/4 CR           |
| wt 2%                | 25               |           | 2.10E-03        | 9.68E-01       | 7.33E-01             |
| wt CR                | 30.8             |           |                 | 3.00E-04       | 5.00E-04             |
| msn 2/4 2%           | 24.2             |           |                 |                | 9.24E-01             |
| msn 2/4 CR           | 23.9             |           |                 |                |                      |
| Fig. 1b              | average lifespan | msn2      | msn2 CR         | msn4           | msn4 CR              |
| msn2                 | 22.5             |           | <1.0E-04        | 1.19E-01       | <1.0E-04             |
| msn2 CR              | 29.9             |           |                 | 1.36E-02       | 7.83E-02             |
| msn4                 | 24.7             |           |                 |                | <1.0E-04             |
| msn4 CR              | 33.2             |           |                 |                |                      |
| Fig. 1c              | average lifespan | wt        | wt + rap        | msn 2/4        | msn 2/4 + rap        |
| wt                   | 23.3             |           | 3.10E-02        | 7.72E-01       | 8.09E-01             |
| wt + rap             | 26.9             |           |                 | 5.52E-02       | 9.20E-03             |
| msn 2/4              | 23.8             |           |                 |                | 5.20E-01             |
| msn 2/4 + rap        | 22.5             |           |                 |                |                      |
| Fig. 2d              | average lifespan | wt        | wt + rap        | pnc1           | pnc1 + rap           |
| wt                   | 22.3             |           | 1.60E-03        | 2.61E-01       | 6.55E-01             |
| wt + rap             | 27.5             |           |                 | 1.00E-04       | 2.00E-04             |
| pnc1                 | 20.9             |           |                 |                | 5.13E-01             |
| pnc1 + rap           | 21.4             |           |                 |                |                      |
| Fig. 2f              | average lifespan | wt        | wt PNC o/e      | msn 2/4        | msn 2/4 + PNC o/e    |
| wt                   | 23.2             |           | 4.40E-03        | 6.27E-01       | 2.42E-02             |
| wt PNC o/e           | 28               |           |                 | 1.20E-03       | 6.79E-01             |
| msn 2/4              | 22               |           |                 |                | 9.20E-03             |
| msn 2/4 + PNC o/e    | 27.3             |           |                 |                |                      |
| Fig. 3e              | average lifespan | wt 30     | wt 37           | msn 2/4 30     | msn 2/4 37           |
| wt 30                | 22.2             |           | 3.10E-03        | 2.09E-01       | 5.91E-02             |
| wt 37                | 26.8             |           |                 | <1.0E-04       | 2.58E-01             |
| msn 2/4 30           | 20.675           |           |                 |                | 6.00E-04             |
| msn 2/4 37           | 25.825           |           |                 |                |                      |
| Fig. S2c             | average lifespan | sir2 fob1 | sir2 fob1 + rap | sir2 hst2 fob1 | sir2 hst2 fob1 + rap |
| sir2 fob1            | 25.7             |           | 4.79E-02        | <1.0E-04       | <1.0E-04             |
| sir2 fob1 + rap      | 31.4             |           |                 | <1.0E-04       | <1.0E-04             |
| sir2 hst2 fob1       | 14.2             |           |                 |                | 2.09E-01             |
| sir2 hst2 fob1 + rap | 15.6             |           |                 |                |                      |
