# Supplementary material
Source: PubMed Central journal article supplement (PMC2043027)

Figure S1

A

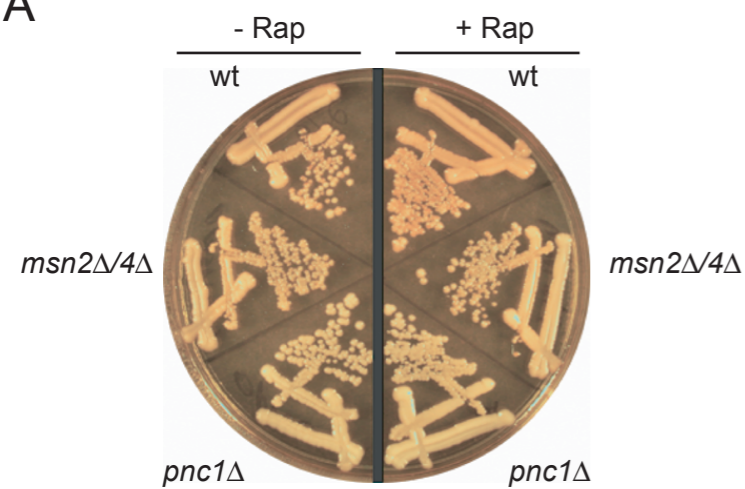

B

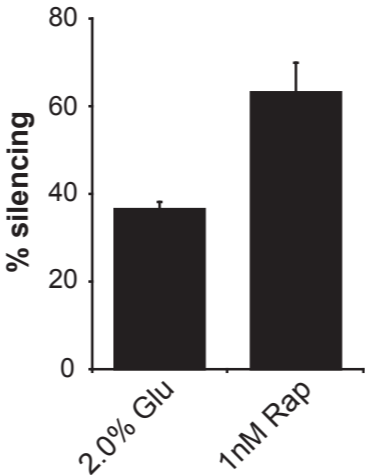

Supplement: pbio.0050261.sg001.pdf [file pbio.0050261.sg001.pdf]

Figure S2

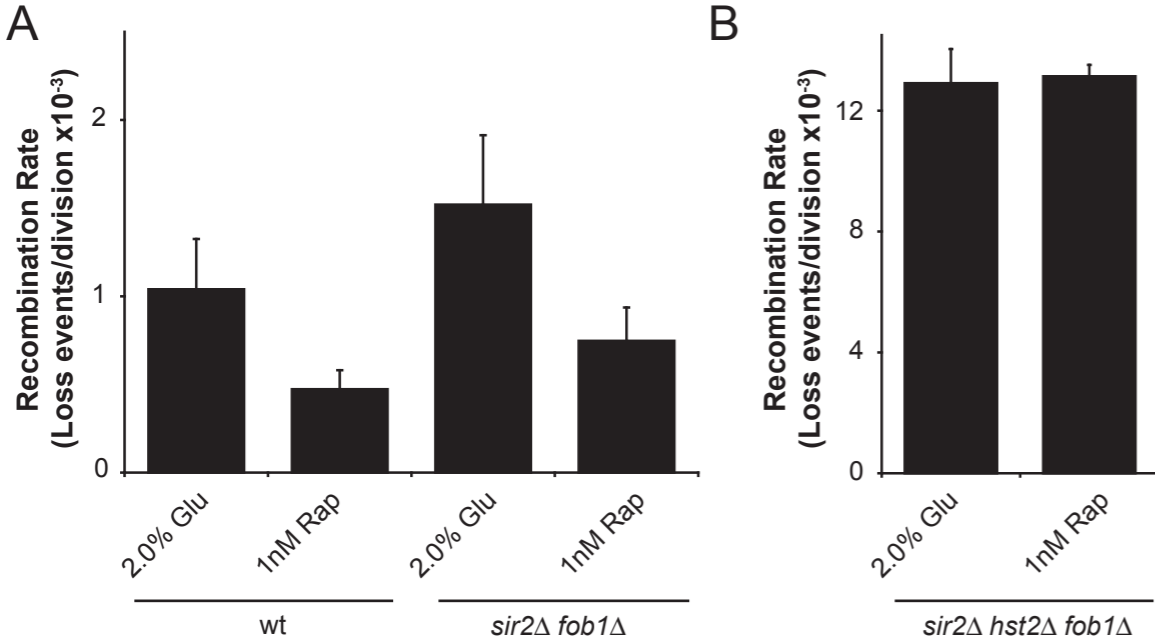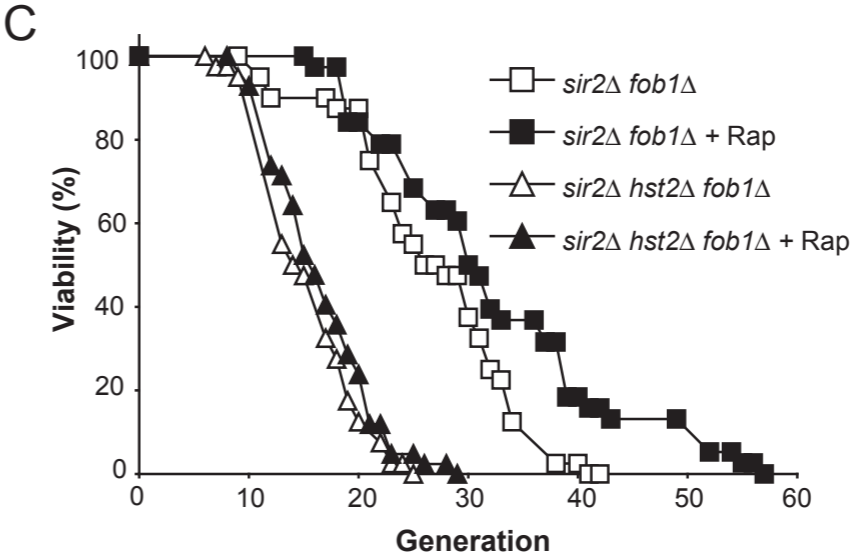

Supplement: pbio.0050261.sg002.pdf [file pbio.0050261.sg002.pdf]

Figure S3

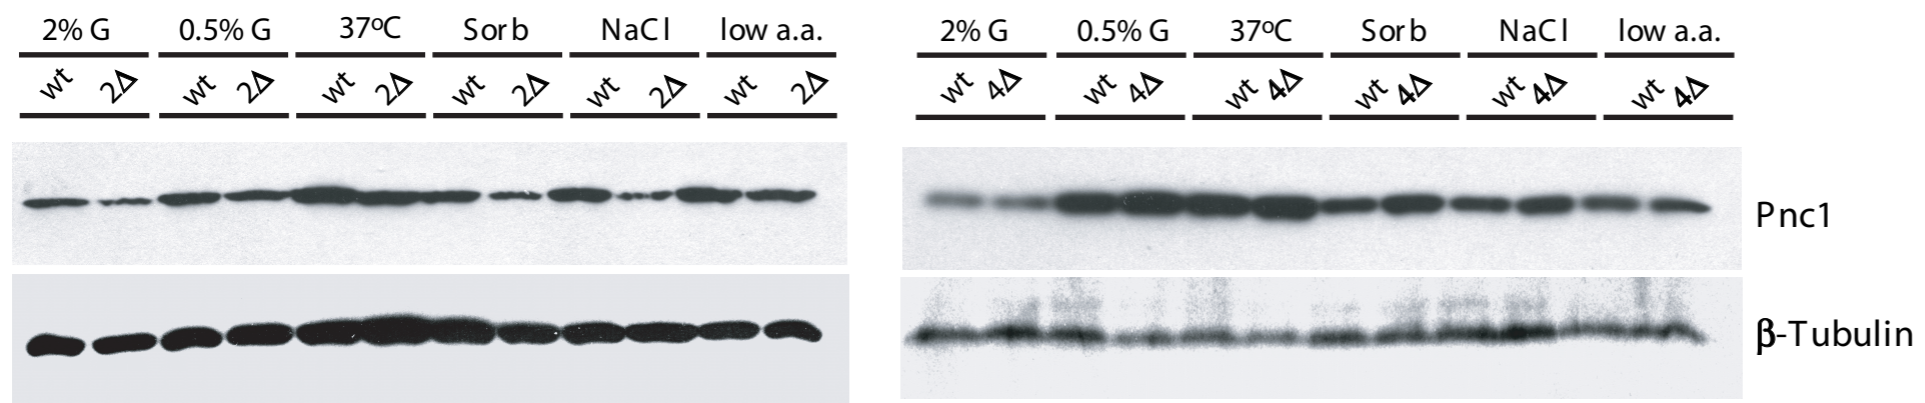

Supplement: pbio.0050261.sg003.pdf [file pbio.0050261.sg003.pdf]

Figure S4

A

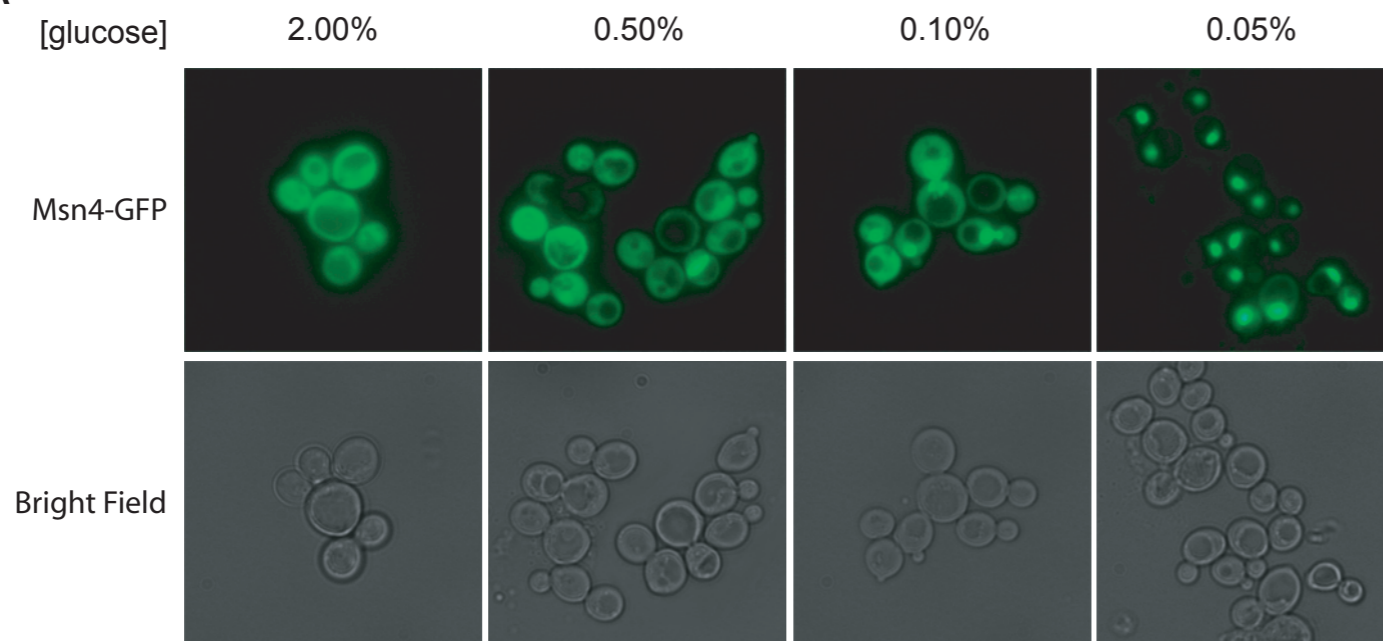

B

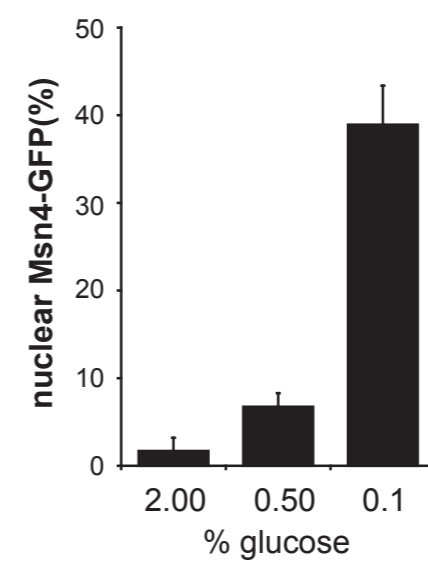

Supplement: pbio.0050261.sg004.pdf [file pbio.0050261.sg004.pdf]

Figure S5

0.5% glucose

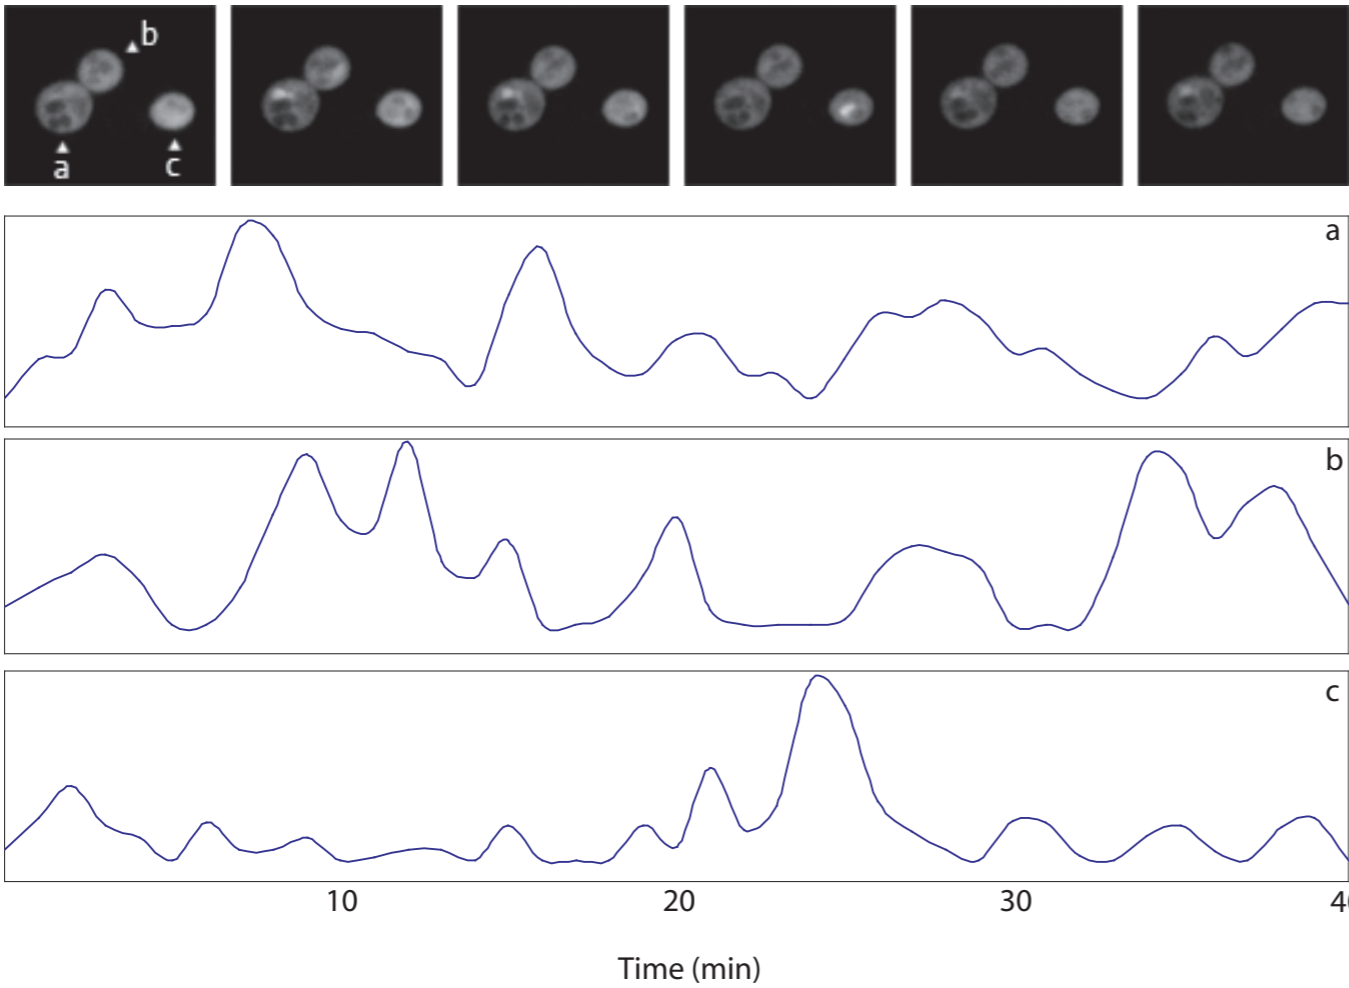

Supplement: pbio.0050261.sg005.pdf [file pbio.0050261.sg005.pdf]

Figure S6

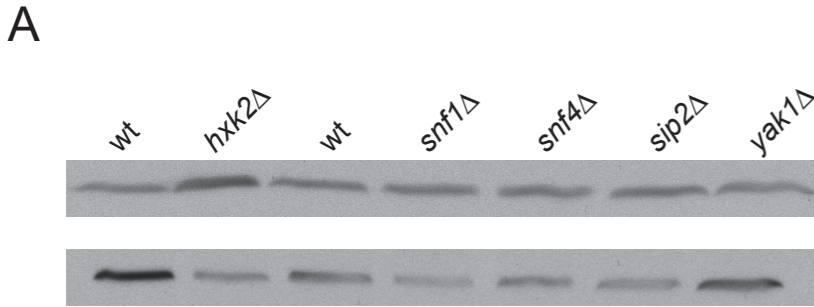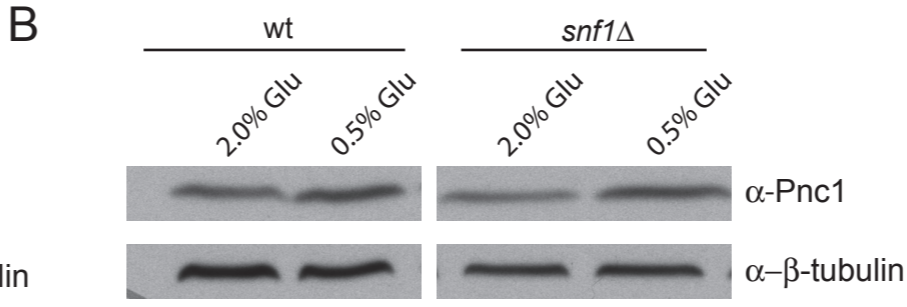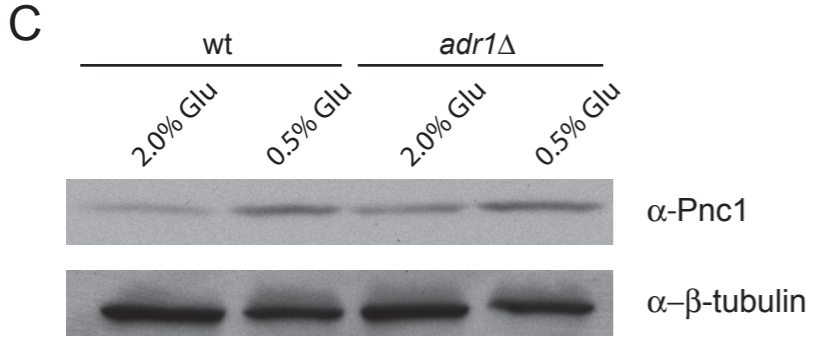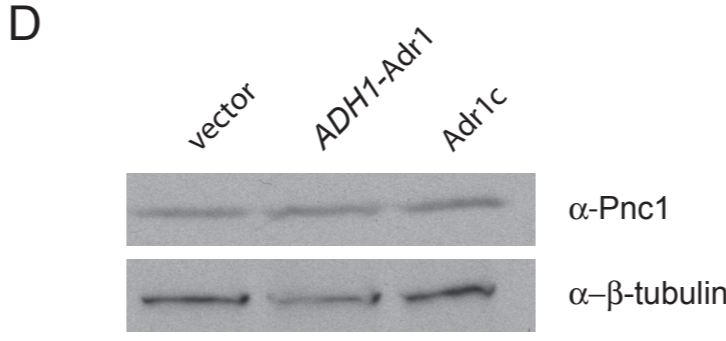

Supplement: pbio.0050261.sg006.pdf [file pbio.0050261.sg006.pdf]
